# Supplementary material for: RNA landscape of evolution for optimal exon and intron discrimination
Source: HighWire-hosted journal article supplement (doi:10.1073/pnas.0801692105), 2008-04-08
Supplement: SD1.pdf [file SD1.pdf]

### Dataset S1. List of predicted EIEs

| Word   | Ns   | Na   | z     |
|--------|------|------|-------|
| AAGAAA | 4155 | 1304 | 45.23 |
| ACCTAC | 886  | 105  | 40.13 |
| GAAGAA | 4724 | 1828 | 39.88 |
| CCTACC | 854  | 100  | 39.67 |
| AGAAAA | 3567 | 1216 | 39.02 |
| AGAAGA | 4540 | 1769 | 38.82 |
| TACCTG | 1438 | 289  | 36.98 |
| AAAGAA | 3593 | 1315 | 36.70 |
| AAGAAG | 4052 | 1624 | 35.65 |
| CTTACC | 604  | 69   | 33.77 |
| CTACCT | 1154 | 227  | 33.59 |
| GAAAAA | 2763 | 978  | 33.19 |
| CAAGAA | 2884 | 1067 | 32.54 |
| AAAAGA | 2629 | 964  | 31.33 |
| GCCTAC | 815  | 141  | 30.64 |
| CCTACA | 1155 | 274  | 29.55 |
| ACCCTG | 1861 | 608  | 29.25 |
| GGAAAA | 2653 | 1058 | 28.99 |
| GAAAGA | 2452 | 956  | 28.51 |
| GGAGAA | 3284 | 1474 | 28.37 |
| AAGGAA | 2635 | 1099 | 27.57 |
| GAGAAA | 2512 | 1027 | 27.49 |
| CCTGGA | 3928 | 1947 | 27.45 |
| GACCTG | 1980 | 727  | 27.15 |
| TGGAGA | 3671 | 1794 | 27.03 |
| TTACCT | 747  | 147  | 26.99 |
| ACAAGA | 1893 | 685  | 26.92 |
| GAGGAG | 3278 | 1569 | 26.23 |
| AACTAC | 883  | 208  | 25.96 |
| CTACAA | 1362 | 427  | 25.90 |
| ACTACA | 1192 | 346  | 25.80 |
| CCCTAC | 671  | 131  | 25.71 |
| AACCTG | 1671 | 605  | 25.27 |
| GAAAAG | 2296 | 974  | 25.27 |
| GAGAAG | 3239 | 1592 | 25.20 |
| AGAGAA | 2745 | 1264 | 25.16 |
| GACTAC | 775  | 176  | 24.95 |
| TGGAAA | 3004 | 1446 | 24.93 |
| CTACCG | 389  | 52   | 24.67 |
| AACAAG | 1726 | 654  | 24.60 |
| CTGGAG | 4159 | 2275 | 24.56 |
| TGTGGA | 2573 | 1177 | 24.55 |
| ACCTGG | 2471 | 1112 | 24.53 |
| TGAAGA | 4197 | 2310 | 24.44 |
| AAAAAA | 2093 | 878  | 24.42 |
| AAGGAG | 2679 | 1258 | 24.28 |

| <b>Word</b> | <b>Ns</b> | <b>Na</b> | <b>z</b> |
|-------------|-----------|-----------|----------|
| GAAAAT      | 2405      | 1084      | 24.15    |
| ACCTGA      | 1455      | 515       | 24.08    |
| AAGAGA      | 2307      | 1025      | 24.05    |
| AGAAAG      | 2573      | 1210      | 23.75    |
| CAAGGA      | 2395      | 1099      | 23.60    |
| ATGGAA      | 2303      | 1042      | 23.53    |
| GACCTA      | 554       | 107       | 23.51    |
| TGGACC      | 1751      | 703       | 23.38    |
| CTACAG      | 1424      | 517       | 23.27    |
| ACCTGC      | 1966      | 838       | 23.26    |
| AAAAAG      | 2143      | 952       | 23.18    |
| GGAGGA      | 3127      | 1621      | 23.04    |
| CTACAC      | 903       | 254       | 23.01    |
| CGCTAC      | 388       | 59        | 22.82    |
| GCTACA      | 1189      | 400       | 22.78    |
| CCTATG      | 875       | 246       | 22.66    |
| AAAGGA      | 2311      | 1085      | 22.55    |
| GGAAGA      | 3115      | 1644      | 22.42    |
| GAAGGA      | 2724      | 1373      | 22.35    |
| CCTACT      | 757       | 197       | 22.35    |
| TGAAAA      | 2645      | 1320      | 22.32    |
| ACTTAC      | 573       | 123       | 22.28    |
| CTACGA      | 537       | 110       | 22.26    |
| ATGAAA      | 2271      | 1072      | 22.21    |
| ACTATG      | 973       | 300       | 22.19    |
| CTATGA      | 1264      | 457       | 22.00    |
| CCTACG      | 444       | 80        | 21.99    |
| GAAAAC      | 1765      | 754       | 21.98    |
| CACCTA      | 731       | 191       | 21.89    |
| GAAGAT      | 2950      | 1562      | 21.71    |
| CAACCT      | 1281      | 477       | 21.54    |
| GAACAA      | 1678      | 716       | 21.46    |
| AATGGA      | 1973      | 904       | 21.46    |
| AAGAAC      | 2005      | 926       | 21.43    |
| GGCTAC      | 968       | 315       | 21.15    |
| GACCCT      | 1283      | 492       | 20.95    |
| CTGGAC      | 2384      | 1207      | 20.78    |
| ACTACC      | 723       | 201       | 20.77    |
| AGAAAT      | 2465      | 1265      | 20.74    |
| GCTACC      | 791       | 236       | 20.55    |
| AGGAGA      | 2855      | 1554      | 20.50    |
| ACCCTA      | 425       | 83        | 20.41    |
| TCAAGA      | 1885      | 885       | 20.36    |
| TATGAA      | 1417      | 590       | 20.25    |
| AGGAAA      | 2553      | 1350      | 20.24    |
| TACCTA      | 389       | 72        | 20.21    |
| CAGAAA      | 2886      | 1594      | 20.15    |
| AACCTA      | 501       | 113       | 20.13    |

| <b>Word</b> | <b>Ns</b> | <b>Na</b> | <b>z</b> |
|-------------|-----------|-----------|----------|
| TGGAGC      | 2620      | 1408      | 20.02    |
| AGTGGA      | 1964      | 951       | 20.00    |
| GCCCTG      | 2585      | 1384      | 20.00    |
| CCCTGG      | 2808      | 1547      | 19.96    |
| AGACCT      | 1408      | 593       | 19.94    |
| GTGGAC      | 1665      | 756       | 19.92    |
| GCCCTA      | 510       | 119       | 19.83    |
| AGAGGA      | 2510      | 1339      | 19.81    |
| TCCTAC      | 850       | 278       | 19.73    |
| GTGGAG      | 2437      | 1291      | 19.72    |
| AGAAGC      | 2548      | 1377      | 19.58    |
| CAACAA      | 1780      | 852       | 19.32    |
| GAACTA      | 753       | 237       | 19.18    |
| CTCAAC      | 1136      | 448       | 19.17    |
| ACCTGT      | 1279      | 535       | 19.14    |
| CAACCC      | 995       | 369       | 19.06    |
| GGACCT      | 1495      | 674       | 19.03    |
| GAGACC      | 1425      | 631       | 18.97    |
| AACAGA      | 1816      | 890       | 18.94    |
| AACAAC      | 1359      | 591       | 18.91    |
| GCTGGA      | 3234      | 1921      | 18.91    |
| CCCTGC      | 2163      | 1135      | 18.83    |
| AGAACA      | 2097      | 1089      | 18.82    |
| GAGAAC      | 1629      | 769       | 18.80    |
| AGAAAC      | 1935      | 980       | 18.71    |
| TACCTC      | 846       | 294       | 18.66    |
| CTACCC      | 607       | 174       | 18.57    |
| AAACAA      | 1736      | 849       | 18.56    |
| CTATGG      | 987       | 375       | 18.54    |
| GACAAC      | 1127      | 459       | 18.48    |
| AATGAA      | 2180      | 1165      | 18.41    |
| TACAAG      | 1196      | 504       | 18.36    |
| CAGAAG      | 3142      | 1883      | 18.34    |
| CTACAT      | 1102      | 448       | 18.31    |
| GTGGAA      | 1996      | 1039      | 18.30    |
| ACCTAT      | 540       | 147       | 18.23    |
| ACAGAA      | 2211      | 1196      | 18.21    |
| ATGAAG      | 2966      | 1758      | 18.18    |
| GCAAGA      | 1542      | 734       | 18.11    |
| CAAGAC      | 1300      | 577       | 18.07    |
| ACAACA      | 1602      | 776       | 18.05    |
| TATGGA      | 1248      | 545       | 18.03    |
| CAACTA      | 730       | 243       | 18.00    |
| GACAAG      | 1433      | 666       | 17.97    |
| ACCTCA      | 1577      | 762       | 17.97    |
| ATGGAG      | 2388      | 1337      | 17.94    |
| CCTGAA      | 2155      | 1176      | 17.74    |
| AAACCT      | 1207      | 527       | 17.74    |

| <b>Word</b> | <b>Ns</b> | <b>Na</b> | <b>z</b> |
|-------------|-----------|-----------|----------|
| ACTACG      | 382       | 85        | 17.72    |
| CCCTGA      | 1801      | 926       | 17.68    |
| AACCCC      | 932       | 362       | 17.63    |
| ACCCCT      | 952       | 375       | 17.57    |
| GCTACG      | 427       | 105       | 17.47    |
| AAAACA      | 1979      | 1062      | 17.43    |
| ACCCCA      | 1463      | 703       | 17.43    |
| CCTGAC      | 1308      | 601       | 17.41    |
| AAAATG      | 2239      | 1255      | 17.34    |
| AGCTAC      | 920       | 361       | 17.34    |
| CATGGA      | 2213      | 1241      | 17.23    |
| GGAGCT      | 2452      | 1424      | 17.12    |
| CCTGCC      | 2144      | 1196      | 17.10    |
| GAAATG      | 1830      | 969       | 17.10    |
| TCAACC      | 1033      | 435       | 17.07    |
| CTATGC      | 730       | 258       | 17.07    |
| GACCCC      | 1213      | 552       | 16.96    |
| GGACCC      | 1298      | 608       | 16.94    |
| TACTAC      | 676       | 231       | 16.93    |
| TACAGA      | 1394      | 674       | 16.88    |
| ACCCCC      | 960       | 395       | 16.87    |
| GATGAA      | 2547      | 1509      | 16.86    |
| ACCAAG      | 1632      | 839       | 16.84    |
| CTCTAC      | 991       | 415       | 16.82    |
| CCAAGA      | 2173      | 1230      | 16.82    |
| GAGGAA      | 2509      | 1486      | 16.74    |
| GCCAAG      | 1832      | 985       | 16.73    |
| AACCCT      | 850       | 333       | 16.69    |
| CTCAAG      | 1435      | 709       | 16.65    |
| AAAGAG      | 2041      | 1141      | 16.63    |
| AAGATG      | 2704      | 1641      | 16.63    |
| GGACAA      | 1435      | 713       | 16.53    |
| CTACGC      | 324       | 71        | 16.48    |
| CTACCA      | 1104      | 495       | 16.46    |
| TACGAG      | 445       | 122       | 16.45    |
| CTACGT      | 418       | 110       | 16.44    |
| ACGAGA      | 612       | 205       | 16.39    |
| GAGGAC      | 1770      | 955       | 16.35    |
| GAAGAC      | 2035      | 1149      | 16.34    |
| CCTGTG      | 2089      | 1190      | 16.32    |
| AAGACC      | 1399      | 696       | 16.29    |
| ATTACC      | 596       | 198       | 16.29    |
| CAGACC      | 1390      | 691       | 16.26    |
| AAAAAC      | 1540      | 796       | 16.23    |
| ACAAGC      | 1246      | 595       | 16.21    |
| AGACAA      | 1507      | 775       | 16.17    |
| ACAACC      | 1041      | 462       | 16.17    |
| AAAACC      | 1291      | 627       | 16.15    |

| <b>Word</b> | <b>Ns</b> | <b>Na</b> | <b>z</b> |
|-------------|-----------|-----------|----------|
| AAGACA      | 1834      | 1010      | 16.14    |
| AAGAAT      | 1968      | 1109      | 16.12    |
| TACAAC      | 951       | 407       | 16.09    |
| CTACGG      | 424       | 116       | 16.08    |
| GCCTAT      | 590       | 198       | 16.06    |
| ATCGAG      | 657       | 235       | 16.01    |
| CCACCC      | 1511      | 784       | 15.99    |
| TGAAAG      | 1915      | 1076      | 15.98    |
| ATCAAC      | 1252      | 607       | 15.94    |
| GGCCTA      | 544       | 176       | 15.92    |
| CCCCTG      | 1714      | 933       | 15.88    |
| GCTATG      | 879       | 368       | 15.85    |
| GAAATT      | 1734      | 949       | 15.84    |
| AAATGA      | 1897      | 1069      | 15.83    |
| AAAAAT      | 2078      | 1204      | 15.82    |
| ATACCT      | 672       | 247       | 15.79    |
| TCTACA      | 1272      | 626       | 15.76    |
| TAAAGA      | 1465      | 760       | 15.75    |
| CAAGCA      | 1615      | 867       | 15.74    |
| AAACTA      | 760       | 299       | 15.71    |
| CAAGAT      | 1719      | 944       | 15.69    |
| CACCCT      | 1297      | 646       | 15.66    |
| AAATTA      | 1166      | 560       | 15.57    |
| ACCCAG      | 1743      | 968       | 15.53    |
| GGAAAT      | 1785      | 1000      | 15.50    |
| TCTACG      | 456       | 137       | 15.49    |
| GCAGAA      | 2379      | 1450      | 15.47    |
| TGGACA      | 2275      | 1370      | 15.47    |
| ATCTAC      | 906       | 395       | 15.39    |
| TATGTG      | 924       | 407       | 15.36    |
| GAACCT      | 1178      | 574       | 15.36    |
| GAAACC      | 1160      | 563       | 15.32    |
| AGACCC      | 1139      | 549       | 15.32    |
| AGGAGC      | 2360      | 1444      | 15.30    |
| ACCTAA      | 418       | 121       | 15.28    |
| ATCAAG      | 1489      | 795       | 15.23    |
| CTGACC      | 1420      | 746       | 15.23    |
| AGAATG      | 1748      | 986       | 15.17    |
| CCCTAT      | 482       | 154       | 15.14    |
| AACGAG      | 559       | 195       | 15.10    |
| GGAGCA      | 2144      | 1289      | 15.06    |
| CGAGAA      | 806       | 340       | 15.05    |
| TGACCC      | 1243      | 628       | 15.04    |
| GTGAAA      | 1526      | 830       | 15.00    |
| GAGCTA      | 707       | 281       | 15.00    |
| AACAAA      | 1719      | 973       | 14.96    |
| CAAGCC      | 1234      | 625       | 14.94    |
| CACCCC      | 1232      | 626       | 14.86    |

| <b>Word</b> | <b>Ns</b> | <b>Na</b> | <b>z</b> |
|-------------|-----------|-----------|----------|
| TGCCTA      | 655       | 253       | 14.85    |
| ACCAGA      | 1675      | 945       | 14.84    |
| TGCTAC      | 916       | 416       | 14.77    |
| GGAGAC      | 1699      | 966       | 14.76    |
| CTACTC      | 660       | 258       | 14.73    |
| ATTGAA      | 1445      | 784       | 14.65    |
| GAAGAG      | 2749      | 1787      | 14.61    |
| AGAAGG      | 2486      | 1578      | 14.61    |
| GAAACA      | 1723      | 991       | 14.59    |
| ACCTTA      | 484       | 162       | 14.58    |
| GGAAAG      | 1770      | 1027      | 14.57    |
| AGATGA      | 2516      | 1604      | 14.57    |
| CGAGGA      | 1063      | 519       | 14.55    |
| AACTAT      | 721       | 298       | 14.55    |
| CAGCTA      | 1011      | 485       | 14.51    |
| CCAACC      | 1119      | 560       | 14.46    |
| TACGAC      | 330       | 88        | 14.45    |
| TACCAG      | 1251      | 654       | 14.39    |
| CCTGCG      | 1018      | 493       | 14.39    |
| AAGCAA      | 1522      | 850       | 14.38    |
| TCTACC      | 894       | 411       | 14.38    |
| TACGTG      | 456       | 150       | 14.36    |
| TGACCT      | 1468      | 812       | 14.34    |
| GGGAAA      | 1416      | 775       | 14.31    |
| TACAAA      | 1188      | 613       | 14.29    |
| GAAGCA      | 2113      | 1305      | 14.22    |
| GAGCTG      | 2940      | 1966      | 14.19    |
| TCAACA      | 1706      | 996       | 14.15    |
| ATCCTG      | 2057      | 1265      | 14.14    |
| CCCAAC      | 1036      | 513       | 14.11    |
| ATGGAC      | 1334      | 723       | 14.10    |
| GACTAT      | 626       | 249       | 14.10    |
| TACCCT      | 557       | 209       | 14.09    |
| CTACTG      | 1050      | 524       | 14.06    |
| TGTGAA      | 1863      | 1120      | 14.04    |
| TCAAGC      | 1100      | 559       | 14.04    |
| GAGAGA      | 1661      | 967       | 14.03    |
| TCAACG      | 520       | 189       | 14.03    |
| CTCACC      | 1199      | 630       | 13.99    |
| AGCCTA      | 490       | 173       | 13.98    |
| AAGCTG      | 2527      | 1645      | 13.97    |
| GGACTA      | 551       | 208       | 13.93    |
| TGGGAA      | 1941      | 1186      | 13.91    |
| AAAGAC      | 1419      | 793       | 13.87    |
| CCTTAC      | 533       | 199       | 13.84    |
| TGGAGG      | 2908      | 1961      | 13.83    |
| ATTATG      | 905       | 433       | 13.78    |
| TTACCG      | 233       | 52        | 13.77    |

| <b>Word</b> | <b>Ns</b> | <b>Na</b> | <b>z</b> |
|-------------|-----------|-----------|----------|
| TGAGAA      | 2005      | 1245      | 13.71    |
| TGGAAG      | 2798      | 1880      | 13.68    |
| GATGGA      | 2053      | 1284      | 13.68    |
| ACAAAA      | 1609      | 943       | 13.65    |
| AAGCAG      | 2291      | 1474      | 13.64    |
| GAAAGC      | 1483      | 849       | 13.64    |
| CCCAGA      | 2139      | 1357      | 13.57    |
| AAATGG      | 1654      | 981       | 13.55    |
| TGGACG      | 856       | 406       | 13.54    |
| AAAGAT      | 1816      | 1106      | 13.54    |
| ATCCTA      | 564       | 223       | 13.46    |
| AGCCTG      | 2127      | 1353      | 13.45    |
| AAGGAC      | 1476      | 851       | 13.44    |
| ATGGGA      | 1373      | 775       | 13.43    |
| CCCCTA      | 489       | 181       | 13.37    |
| AGAACC      | 1265      | 699       | 13.33    |
| ACCAAC      | 1106      | 585       | 13.31    |
| CAGAGA      | 2438      | 1610      | 13.29    |
| AGTACC      | 797       | 373       | 13.29    |
| TTACCA      | 909       | 449       | 13.25    |
| CAAGAG      | 1566      | 928       | 13.21    |
| GTACCT      | 710       | 318       | 13.21    |
| TCAGAA      | 2163      | 1396      | 13.16    |
| TATGAG      | 911       | 454       | 13.11    |
| AATTAC      | 756       | 350       | 13.11    |
| CCCACC      | 1545      | 916       | 13.11    |
| TTACCC      | 480       | 180       | 13.08    |
| ATGAGA      | 1492      | 877       | 13.08    |
| GGTGGA      | 1990      | 1263      | 13.07    |
| GTGACC      | 1233      | 685       | 13.05    |
| GACCAA      | 1127      | 608       | 13.05    |
| ACTACT      | 734       | 337       | 13.05    |
| AGAACT      | 1751      | 1077      | 13.05    |
| CCTGGC      | 2516      | 1689      | 13.00    |
| TATGAC      | 791       | 376       | 12.98    |
| GATTAC      | 539       | 216       | 12.98    |
| AAGATT      | 1431      | 836       | 12.94    |
| ATCGTG      | 604       | 257       | 12.90    |
| TACCTT      | 637       | 278       | 12.88    |
| GAAGCT      | 2244      | 1476      | 12.87    |
| GACGAG      | 692       | 314       | 12.84    |
| CAACGA      | 567       | 237       | 12.74    |
| ACCCAA      | 903       | 459       | 12.71    |
| CAAGTG      | 1320      | 762       | 12.69    |
| CCAAGC      | 1446      | 858       | 12.66    |
| AGATCA      | 1467      | 874       | 12.66    |
| GCGCTA      | 227       | 56        | 12.66    |
| GGAGAT      | 1828      | 1155      | 12.64    |

| <b>Word</b> | <b>Ns</b> | <b>Na</b> | <b>z</b> |
|-------------|-----------|-----------|----------|
| ACCCTC      | 1019      | 543       | 12.64    |
| TTACAA      | 1012      | 539       | 12.60    |
| ATGGAT      | 1452      | 865       | 12.60    |
| AGCAGA      | 2312      | 1545      | 12.60    |
| CGACCT      | 493       | 195       | 12.58    |
| GAGCAA      | 1333      | 776       | 12.57    |
| AAGACT      | 1267      | 727       | 12.56    |
| CCCTAA      | 405       | 145       | 12.55    |
| GTCTAC      | 595       | 258       | 12.54    |
| AGTGAA      | 1547      | 941       | 12.52    |
| TACCGG      | 313       | 97        | 12.50    |
| CAGAAC      | 1615      | 996       | 12.46    |
| TACCGC      | 334       | 108       | 12.46    |
| CCTAGA      | 511       | 208       | 12.44    |
| TGCAGA      | 2598      | 1790      | 12.41    |
| ATTACA      | 956       | 505       | 12.39    |
| AGATTG      | 1057      | 578       | 12.38    |
| AGACCA      | 1553      | 952       | 12.36    |
| CGCCTA      | 243       | 65        | 12.35    |
| GGGACC      | 1189      | 676       | 12.35    |
| TGAAAC      | 1326      | 781       | 12.28    |
| CGAGAT      | 573       | 249       | 12.28    |
| CCAGAA      | 2581      | 1784      | 12.27    |
| AAGCTA      | 729       | 351       | 12.26    |
| GAACCC      | 883       | 457       | 12.26    |
| AAGTGG      | 1547      | 953       | 12.22    |
| TTATGA      | 1021      | 557       | 12.21    |
| CCTAAA      | 604       | 270       | 12.21    |
| TGTGTG      | 1570      | 972       | 12.20    |
| CGAGAC      | 516       | 215       | 12.19    |
| CCGAGA      | 827       | 420       | 12.18    |
| ACAACT      | 1185      | 679       | 12.17    |
| AAACAG      | 1754      | 1118      | 12.17    |
| GCCAAC      | 1155      | 657       | 12.16    |
| AGACTA      | 510       | 212       | 12.15    |
| CGGGAA      | 707       | 339       | 12.14    |
| TTGGAA      | 2009      | 1323      | 12.14    |
| TCTATG      | 993       | 539       | 12.14    |
| GACCCA      | 1135      | 644       | 12.10    |
| AGCAAG      | 1630      | 1023      | 12.10    |
| TTTACC      | 716       | 346       | 12.10    |
| AGTATG      | 855       | 442       | 12.09    |
| AGATTA      | 706       | 340       | 12.07    |
| AGCAAC      | 1318      | 783       | 12.06    |
| ATTGGA      | 1229      | 716       | 12.05    |
| AAAAGG      | 1532      | 949       | 12.04    |
| CACCTG      | 2084      | 1389      | 12.03    |
| CCTATT      | 539       | 232       | 12.03    |

| <b>Word</b> | <b>Ns</b> | <b>Na</b> | <b>z</b> |
|-------------|-----------|-----------|----------|
| CAAAAA      | 1810      | 1170      | 12.00    |
| CAAGCT      | 1456      | 892       | 11.98    |
| CCTGAT      | 1329      | 795       | 11.96    |
| TTATGG      | 823       | 423       | 11.95    |
| GCAACC      | 830       | 428       | 11.95    |
| AGAGAC      | 1303      | 776       | 11.94    |
| CCTAAT      | 407       | 154       | 11.94    |
| ATCGAC      | 405       | 153       | 11.92    |
| TGGAAC      | 1639      | 1040      | 11.87    |
| AACTTA      | 636       | 298       | 11.85    |
| GACAGA      | 1467      | 906       | 11.85    |
| GTATGA      | 750       | 375       | 11.85    |
| ATGTGG      | 1687      | 1080      | 11.82    |
| GAGTAC      | 776       | 394       | 11.80    |
| TCGAGA      | 581       | 263       | 11.80    |
| AATTGA      | 1031      | 577       | 11.79    |
| CTTACT      | 594       | 272       | 11.77    |
| GAAACT      | 1469      | 911       | 11.76    |
| CACTAC      | 707       | 348       | 11.74    |
| GGAACC      | 1116      | 642       | 11.73    |
| GTGGAT      | 1447      | 895       | 11.73    |
| AGCTAT      | 753       | 380       | 11.72    |
| GAAAGT      | 1393      | 854       | 11.71    |
| GAATTA      | 843       | 444       | 11.69    |
| GACCTC      | 1275      | 766       | 11.63    |
| CTGAAA      | 1976      | 1322      | 11.62    |
| ACACCC      | 962       | 532       | 11.61    |
| TGGACT      | 1484      | 929       | 11.60    |
| CCGGGA      | 984       | 549       | 11.58    |
| CCCCCC      | 704       | 350       | 11.56    |
| CGCCTG      | 947       | 523       | 11.54    |
| CATCGA      | 822       | 433       | 11.54    |
| GAACGA      | 474       | 200       | 11.53    |
| AAACCC      | 847       | 452       | 11.49    |
| CTATGT      | 727       | 368       | 11.47    |
| AGCCCT      | 1510      | 955       | 11.47    |
| ATGCTA      | 711       | 357       | 11.47    |
| CTTACA      | 747       | 382       | 11.47    |
| TACCCA      | 719       | 363       | 11.45    |
| GGAAAC      | 1292      | 786       | 11.44    |
| ACCTAG      | 315       | 109       | 11.40    |
| AAGCCC      | 1298      | 792       | 11.40    |
| ACAACG      | 496       | 216       | 11.39    |
| ACAAGG      | 1338      | 824       | 11.37    |
| GCTACT      | 792       | 416       | 11.37    |
| TATGCC      | 699       | 351       | 11.37    |
| GACCGG      | 471       | 201       | 11.35    |
| CGGGAG      | 959       | 538       | 11.33    |

| <b>Word</b> | <b>Ns</b> | <b>Na</b> | <b>z</b> |
|-------------|-----------|-----------|----------|
| ATGTGA      | 1239      | 750       | 11.31    |
| CCCAAG      | 1454      | 918       | 11.29    |
| TACCGA      | 275       | 89        | 11.29    |
| GTCAAC      | 852       | 462       | 11.26    |
| GGACGA      | 679       | 340       | 11.25    |
| ACCGGC      | 534       | 243       | 11.24    |
| GATCGA      | 424       | 174       | 11.23    |
| GAGAAT      | 1448      | 917       | 11.20    |
| GGAGCG      | 833       | 450       | 11.19    |
| AGGACC      | 1415      | 892       | 11.17    |
| TACCCC      | 524       | 238       | 11.16    |
| GAGATC      | 1279      | 787       | 11.14    |
| AACCTC      | 1045      | 608       | 11.14    |
| CAGATG      | 2326      | 1637      | 11.11    |
| GCGGGA      | 732       | 381       | 11.07    |
| GTGAAG      | 2020      | 1385      | 11.07    |
| CTCCTA      | 747       | 393       | 11.02    |
| GTCAAG      | 1009      | 585       | 11.01    |
| ATCGCC      | 509       | 231       | 11.01    |
| GCTTAC      | 425       | 178       | 11.00    |
| TGCCCT      | 1598      | 1046      | 10.97    |
| CGAGTG      | 573       | 274       | 10.96    |
| CGTGGA      | 1027      | 600       | 10.96    |
| CCCTGT      | 1222      | 750       | 10.94    |
| ATATGA      | 988       | 572       | 10.92    |
| CTACTT      | 892       | 501       | 10.91    |
| CAACGG      | 487       | 219       | 10.88    |
| AATGTG      | 1397      | 891       | 10.84    |
| ATGAAC      | 1345      | 850       | 10.84    |
| CTAAAG      | 770       | 415       | 10.80    |
| GGACCG      | 553       | 264       | 10.79    |
| AGAACG      | 601       | 297       | 10.77    |
| TGGATG      | 2367      | 1691      | 10.76    |
| ACCGAG      | 651       | 332       | 10.74    |
| TATGGG      | 672       | 347       | 10.73    |
| GCAAGC      | 991       | 581       | 10.70    |
| TACCAA      | 856       | 481       | 10.68    |
| CCGCTA      | 231       | 72        | 10.67    |
| AAGATC      | 1515      | 993       | 10.65    |
| AACGAC      | 372       | 151       | 10.63    |
| CGACTA      | 224       | 69        | 10.61    |
| GGAGAG      | 1942      | 1344      | 10.61    |
| GATTAT      | 807       | 447       | 10.60    |
| AAGATA      | 1164      | 718       | 10.58    |
| TGGAAT      | 1794      | 1224      | 10.56    |
| CCCCAA      | 1316      | 838       | 10.56    |
| TATGAT      | 931       | 541       | 10.53    |
| TACACC      | 786       | 434       | 10.52    |

| <b>Word</b> | <b>Ns</b> | <b>Na</b> | <b>z</b> |
|-------------|-----------|-----------|----------|
| CTGGTG      | 2497      | 1818      | 10.46    |
| TATTAC      | 564       | 278       | 10.46    |
| CTCAGA      | 1714      | 1164      | 10.44    |
| CTGCGG      | 1095      | 670       | 10.42    |
| TACGCC      | 281       | 101       | 10.40    |
| CGAGAG      | 672       | 355       | 10.39    |
| CAAAGA      | 2343      | 1692      | 10.38    |
| GCTCAA      | 1111      | 684       | 10.37    |
| CAACAG      | 1666      | 1128      | 10.37    |
| CCCTCA      | 1335      | 861       | 10.35    |
| TGTGAC      | 1208      | 761       | 10.34    |
| ATGCAA      | 1067      | 651       | 10.34    |
| AACCAG      | 1561      | 1044      | 10.33    |
| TGCAAG      | 1381      | 899       | 10.32    |
| ACAAGT      | 1056      | 643       | 10.32    |
| TCTTAC      | 600       | 306       | 10.31    |
| AAAAGC      | 1461      | 965       | 10.28    |
| CTGGCC      | 2519      | 1848      | 10.27    |
| GCGAGA      | 561       | 280       | 10.27    |
| TTTATG      | 1073      | 659       | 10.24    |
| GAGACA      | 1400      | 918       | 10.23    |
| AATATG      | 1151      | 721       | 10.21    |
| CTGTGG      | 2473      | 1814      | 10.18    |
| AGAAGT      | 1907      | 1336      | 10.18    |
| GAATGG      | 1325      | 860       | 10.18    |
| AACCAA      | 1145      | 718       | 10.16    |
| AACTAG      | 390       | 169       | 10.15    |
| AGGAGG      | 2573      | 1902      | 10.14    |
| CAAGCG      | 455       | 211       | 10.14    |
| AGTGTG      | 1295      | 838       | 10.13    |
| CAACCA      | 1316      | 855       | 10.12    |
| TGGCTA      | 934       | 556       | 10.12    |
| ATGAAT      | 1330      | 867       | 10.10    |
| CCTCAA      | 1449      | 963       | 10.10    |
| GACCGA      | 430       | 196       | 10.06    |
| AAAGTG      | 1447      | 963       | 10.06    |
| TGAAGC      | 1960      | 1387      | 10.05    |
| ACTGTG      | 1769      | 1228      | 10.04    |
| TGATGA      | 2705      | 2022      | 10.04    |
| AAATTG      | 1268      | 820       | 10.03    |
| AAACCA      | 1499      | 1007      | 10.02    |
| CGACAA      | 393       | 173       | 10.01    |
| GGCCCT      | 1618      | 1105      | 10.01    |
| CTGCGA      | 651       | 349       | 10.01    |
| TGCCTG      | 1957      | 1387      | 10.00    |
| AAGGAT      | 1375      | 908       | 9.98     |
| CTACTA      | 548       | 277       | 9.97     |
| CAACCG      | 412       | 186       | 9.96     |

| <b>Word</b> | <b>Ns</b> | <b>Na</b> | <b>z</b> |
|-------------|-----------|-----------|----------|
| CGCTAT      | 240       | 83        | 9.95     |
| ACCAA       | 1371      | 907       | 9.93     |
| AGAGAG      | 1653      | 1138      | 9.91     |
| TGATCG      | 452       | 213       | 9.91     |
| AAATCA      | 1514      | 1024      | 9.91     |
| CCTGCT      | 2460      | 1819      | 9.91     |
| ACCGGA      | 447       | 210       | 9.89     |
| GAATGA      | 1313      | 862       | 9.88     |
| CCCCCA      | 1473      | 992       | 9.87     |
| GATCAA      | 1085      | 682       | 9.84     |
| CCTATC      | 459       | 219       | 9.84     |
| ACGAGT      | 395       | 177       | 9.84     |
| AGATGG      | 2021      | 1451      | 9.80     |
| CAGTGG      | 2208      | 1610      | 9.80     |
| AAGTAC      | 927       | 561       | 9.78     |
| AAGAGG      | 1872      | 1327      | 9.78     |
| CTGCCC      | 2217      | 1619      | 9.77     |
| TTCGAG      | 569       | 296       | 9.77     |
| CTGTGA      | 2007      | 1442      | 9.75     |
| CAACAT      | 1532      | 1046      | 9.74     |
| TGTATG      | 921       | 558       | 9.73     |
| TGACTA      | 555       | 287       | 9.73     |
| TACATC      | 1038      | 649       | 9.73     |
| GCCTGA      | 1330      | 882       | 9.72     |
| AGATCG      | 463       | 224       | 9.71     |
| GAGCGA      | 482       | 237       | 9.70     |
| AACGTG      | 613       | 329       | 9.69     |
| AAGTGA      | 1218      | 793       | 9.69     |
| GTTACC      | 449       | 215       | 9.68     |
| ACAGAT      | 1457      | 987       | 9.68     |
| ACGAGG      | 730       | 415       | 9.67     |
| CACCCA      | 1455      | 986       | 9.67     |
| ACTGGA      | 1970      | 1415      | 9.67     |
| TGCCAA      | 1679      | 1171      | 9.67     |
| GAGAGC      | 1467      | 996       | 9.66     |
| GAGCCT      | 1395      | 938       | 9.64     |
| GCCGAG      | 894       | 540       | 9.64     |
| GGACCA      | 1427      | 966       | 9.60     |
| TGAACC      | 1068      | 677       | 9.60     |
| TATGGC      | 782       | 456       | 9.60     |
| CACCAA      | 1761      | 1244      | 9.57     |
| CAACGC      | 402       | 186       | 9.56     |
| GACCTT      | 1080      | 688       | 9.55     |
| GATTGA      | 829       | 493       | 9.55     |
| AAATAC      | 1116      | 717       | 9.54     |
| AGTGCC      | 1288      | 856       | 9.52     |
| GCCAGA      | 1674      | 1174      | 9.51     |
| ACGTGG      | 885       | 537       | 9.51     |

| <b>Word</b> | <b>Ns</b> | <b>Na</b> | <b>z</b> |
|-------------|-----------|-----------|----------|
| TTACAG      | 1037      | 656       | 9.50     |
| AACTAA      | 511       | 261       | 9.49     |
| TTTGGA      | 1967      | 1422      | 9.48     |
| GAACAG      | 1619      | 1131      | 9.45     |
| AGTACA      | 1009      | 636       | 9.44     |
| AACCCA      | 1001      | 630       | 9.43     |
| GACAAA      | 1325      | 891       | 9.40     |
| CGCAAG      | 411       | 195       | 9.37     |
| CTGGAA      | 2900      | 2235      | 9.36     |
| GAATAT      | 1231      | 817       | 9.34     |
| CCTGAG      | 1814      | 1301      | 9.32     |
| ATTTAC      | 769       | 454       | 9.31     |
| TCCCTA      | 452       | 224       | 9.30     |
| CTTATG      | 672       | 382       | 9.28     |
| TGCCCC      | 1346      | 913       | 9.28     |
| CTATAC      | 410       | 196       | 9.27     |
| TCAAGG      | 1394      | 953       | 9.26     |
| GCGCAA      | 293       | 121       | 9.26     |
| GACGAC      | 468       | 236       | 9.24     |
| TGCGAG      | 498       | 257       | 9.24     |
| AGAGAT      | 1475      | 1021      | 9.24     |
| ACAGAG      | 1751      | 1252      | 9.23     |
| AGCTGG      | 2875      | 2222      | 9.22     |
| TGACAA      | 1534      | 1072      | 9.19     |
| CTTCGA      | 713       | 415       | 9.19     |
| GGATGA      | 1959      | 1431      | 9.18     |
| AACGGC      | 440       | 218       | 9.18     |
| AGTTAC      | 602       | 333       | 9.17     |
| GTACAA      | 829       | 504       | 9.17     |
| GTCCTA      | 460       | 232       | 9.16     |
| GTGTGA      | 1069      | 694       | 9.13     |
| TACTAT      | 556       | 301       | 9.11     |
| CGCCAA      | 500       | 261       | 9.11     |
| TATACC      | 472       | 242       | 9.08     |
| GAGATT      | 1110      | 729       | 9.08     |
| AATCAA      | 1085      | 709       | 9.07     |
| GAGATG      | 1855      | 1348      | 9.07     |
| GCCTGG      | 2469      | 1877      | 9.06     |
| GCCTTA      | 550       | 298       | 9.05     |
| TGTACC      | 828       | 507       | 9.04     |
| GAAGTG      | 1540      | 1084      | 9.04     |
| GCCTGC      | 1854      | 1349      | 9.03     |
| ACCTCT      | 1171      | 780       | 9.03     |
| CGGGAC      | 616       | 348       | 8.98     |
| GCCCAA      | 1047      | 682       | 8.97     |
| ACGACG      | 279       | 116       | 8.97     |
| ACCGGG      | 547       | 298       | 8.95     |
| CCTGTC      | 1303      | 891       | 8.95     |

| <b>Word</b> | <b>Ns</b> | <b>Na</b> | <b>z</b> |
|-------------|-----------|-----------|----------|
| CAGTAC      | 954       | 609       | 8.94     |
| AAGTTA      | 724       | 431       | 8.90     |
| GAGTGG      | 1214      | 821       | 8.87     |
| CTGAAG      | 2849      | 2222      | 8.87     |
| GACCGC      | 436       | 221       | 8.86     |
| GCACCC      | 1003      | 651       | 8.85     |
| GACGTG      | 628       | 360       | 8.85     |
| TTGAAA      | 1760      | 1279      | 8.83     |
| ATGCTG      | 2250      | 1701      | 8.82     |
| CCCCCT      | 1000      | 650       | 8.81     |
| AGACCG      | 423       | 213       | 8.80     |
| GAAATC      | 1367      | 950       | 8.80     |
| GCCCCT      | 1204      | 816       | 8.79     |
| CGACGA      | 262       | 108       | 8.77     |
| AAAATT      | 1692      | 1225      | 8.76     |
| GAAAGG      | 1309      | 904       | 8.75     |
| GGAACA      | 1585      | 1135      | 8.75     |
| AAAGCA      | 1716      | 1246      | 8.74     |
| TATTGA      | 872       | 551       | 8.73     |
| CGACCC      | 374       | 181       | 8.72     |
| AATTAT      | 893       | 568       | 8.71     |
| GAAGCC      | 1818      | 1335      | 8.70     |
| AAGCCT      | 1179      | 800       | 8.68     |
| TTCAAG      | 1639      | 1184      | 8.67     |
| TGGGAC      | 1253      | 861       | 8.67     |
| GAAATA      | 1266      | 873       | 8.64     |
| AATACC      | 637       | 372       | 8.64     |
| ACGACC      | 389       | 193       | 8.61     |
| AAAATA      | 1492      | 1063      | 8.61     |
| GGAGTG      | 1206      | 825       | 8.60     |
| ACGCCT      | 470       | 250       | 8.60     |
| TATGCA      | 780       | 483       | 8.59     |
| GAGCCC      | 1427      | 1010      | 8.57     |
| AGACAG      | 1614      | 1168      | 8.56     |
| AATTAA      | 840       | 531       | 8.56     |
| GAATAC      | 735       | 449       | 8.56     |
| AGAATT      | 1534      | 1101      | 8.55     |
| ACCGAC      | 343       | 163       | 8.54     |
| ATGACA      | 1593      | 1152      | 8.52     |
| GGCCAA      | 1421      | 1007      | 8.52     |
| TACATG      | 929       | 603       | 8.52     |
| ACATCG      | 613       | 357       | 8.51     |
| GGAAGC      | 1819      | 1346      | 8.50     |
| GTACGA      | 293       | 131       | 8.49     |
| AGATGC      | 1569      | 1134      | 8.47     |
| AAAACT      | 1431      | 1018      | 8.46     |
| GCTAGA      | 473       | 255       | 8.45     |
| AACGCC      | 415       | 214       | 8.44     |

| <b>Word</b> | <b>Ns</b> | <b>Na</b> | <b>z</b> |
|-------------|-----------|-----------|----------|
| GACGGC      | 631       | 373       | 8.42     |
| CAGCCC      | 2140      | 1629      | 8.40     |
| ATCAGA      | 1452      | 1039      | 8.39     |
| ACAGAC      | 1211      | 838       | 8.38     |
| TACGGG      | 267       | 116       | 8.37     |
| GAATGC      | 992       | 659       | 8.36     |
| AAGCCA      | 1821      | 1355      | 8.36     |
| CCTATA      | 374       | 187       | 8.36     |
| CAGACA      | 1751      | 1295      | 8.35     |
| GCTGTG      | 2305      | 1776      | 8.35     |
| CCAACG      | 509       | 284       | 8.32     |
| AGCGAC      | 427       | 225       | 8.30     |
| ATTGCC      | 950       | 627       | 8.30     |
| ACGGGA      | 474       | 259       | 8.29     |
| CATGAA      | 1753      | 1300      | 8.29     |
| ATGACC      | 1239      | 865       | 8.28     |
| GGCAAC      | 883       | 574       | 8.28     |
| CCAGAC      | 1340      | 950       | 8.27     |
| CCTGCA      | 2485      | 1940      | 8.25     |
| ACTAAA      | 598       | 352       | 8.25     |
| CAACGT      | 485       | 268       | 8.25     |
| AGCCCC      | 1494      | 1081      | 8.24     |
| TAATGA      | 1066      | 724       | 8.23     |
| TACGGC      | 315       | 149       | 8.23     |
| GAGGCC      | 1852      | 1389      | 8.21     |
| TAAAAA      | 1202      | 837       | 8.21     |
| TTATGC      | 570       | 332       | 8.21     |
| GTGCCC      | 1257      | 884       | 8.18     |
| TCCTAT      | 631       | 379       | 8.18     |
| GCAACG      | 415       | 219       | 8.17     |
| ACGGAA      | 459       | 251       | 8.15     |
| TGACCG      | 541       | 312       | 8.13     |
| ACTCTA      | 476       | 264       | 8.12     |
| TGAGGA      | 2228      | 1722      | 8.12     |
| ACCCCG      | 535       | 308       | 8.11     |
| GACTTA      | 482       | 269       | 8.09     |
| CCAGAG      | 2274      | 1765      | 8.07     |
| GAGTGC      | 913       | 605       | 8.07     |
| AGTGAC      | 1073      | 736       | 8.06     |
| AGACAT      | 1277      | 906       | 8.05     |
| TGAACG      | 497       | 281       | 8.05     |
| CGGAAA      | 553       | 323       | 8.04     |
| GAGCGG      | 705       | 440       | 8.04     |
| TTCTAC      | 1015      | 689       | 8.04     |
| CTAGAA      | 720       | 452       | 8.03     |
| CAACTG      | 1401      | 1012      | 8.02     |
| TGGTGG      | 2571      | 2031      | 8.01     |
| CCAACA      | 1528      | 1121      | 8.00     |

| <b>Word</b> | <b>Ns</b> | <b>Na</b> | <b>z</b> |
|-------------|-----------|-----------|----------|
| CAGCGA      | 861       | 566       | 7.98     |
| ATACAA      | 837       | 547       | 7.97     |
| GGGAAG      | 1659      | 1235      | 7.96     |
| TTAAAG      | 1054      | 724       | 7.96     |
| CAACAC      | 1067      | 735       | 7.95     |
| AAGAGC      | 1586      | 1173      | 7.95     |
| AGCGAG      | 681       | 424       | 7.94     |
| ATGCCA      | 1662      | 1239      | 7.94     |
| TTACAC      | 573       | 341       | 7.92     |
| CTAGAG      | 544       | 319       | 7.92     |
| GACATC      | 1441      | 1051      | 7.91     |
| ACCGCA      | 502       | 288       | 7.90     |
| TGTGCC      | 1373      | 994       | 7.89     |
| ATCTTA      | 590       | 355       | 7.88     |
| AGAATA      | 1143      | 801       | 7.88     |
| AATGAG      | 1244      | 886       | 7.87     |
| GGAATG      | 1283      | 919       | 7.86     |
| GGACAT      | 1339      | 967       | 7.85     |
| TCACCC      | 1034      | 712       | 7.84     |
| GATTTA      | 753       | 484       | 7.83     |
| GCACTA      | 481       | 274       | 7.82     |
| GCGACC      | 332       | 167       | 7.81     |
| AATTTA      | 885       | 591       | 7.80     |
| TTCGAC      | 369       | 194       | 7.74     |
| CTAACC      | 291       | 140       | 7.74     |
| GACCAT      | 1061      | 738       | 7.74     |
| GGAATT      | 1270      | 914       | 7.72     |
| GTGTGC      | 1054      | 733       | 7.71     |
| CGGACC      | 421       | 232       | 7.71     |
| GGCTAT      | 650       | 406       | 7.71     |
| GCAACA      | 1243      | 892       | 7.70     |
| ACTCAA      | 836       | 555       | 7.69     |
| CCCCAG      | 2203      | 1725      | 7.68     |
| TCCTGA      | 2003      | 1549      | 7.68     |
| GACGGA      | 474       | 272       | 7.67     |
| ATTGTG      | 1046      | 728       | 7.67     |
| CTATTC      | 575       | 349       | 7.66     |
| GAGCGC      | 571       | 346       | 7.66     |
| CTGCTA      | 940       | 641       | 7.65     |
| AATGCA      | 1254      | 904       | 7.63     |
| AGCTGA      | 2094      | 1632      | 7.63     |
| GAGTAT      | 691       | 441       | 7.61     |
| AACGGA      | 346       | 180       | 7.61     |
| CCAAGG      | 1733      | 1317      | 7.60     |
| ACGACA      | 445       | 252       | 7.60     |
| GCCTGT      | 1319      | 961       | 7.59     |
| CCCAGC      | 2397      | 1903      | 7.58     |
| CGGCTA      | 277       | 133       | 7.57     |

| <b>Word</b> | <b>Ns</b> | <b>Na</b> | <b>z</b> |
|-------------|-----------|-----------|----------|
| ACATTA      | 716       | 462       | 7.57     |
| CAGTGA      | 1928      | 1489      | 7.57     |
| AGCTAA      | 567       | 345       | 7.57     |
| ATTACT      | 722       | 467       | 7.56     |
| GTTACA      | 645       | 406       | 7.56     |
| ACAGTG      | 1718      | 1306      | 7.56     |
| TGAACA      | 1597      | 1201      | 7.56     |
| CCGCCT      | 853       | 573       | 7.56     |
| GAATTG      | 1008      | 701       | 7.54     |
| GGGAGA      | 1517      | 1133      | 7.54     |
| GCGGAG      | 663       | 421       | 7.53     |
| CCGAAA      | 423       | 237       | 7.53     |
| CGAAAA      | 394       | 216       | 7.52     |
| ACCGAA      | 376       | 203       | 7.52     |
| GTGCTA      | 497       | 293       | 7.50     |
| ACCGCC      | 497       | 293       | 7.50     |
| GCAACT      | 925       | 634       | 7.50     |
| CGGAGA      | 727       | 473       | 7.50     |
| GACCAG      | 1524      | 1141      | 7.49     |
| ACGACT      | 371       | 200       | 7.48     |
| CCCGAG      | 767       | 506       | 7.47     |
| AGTACG      | 289       | 143       | 7.44     |
| TTAGAA      | 892       | 609       | 7.43     |
| CGTGTG      | 640       | 406       | 7.42     |
| CCGACC      | 394       | 218       | 7.41     |
| GACATG      | 1200      | 868       | 7.39     |
| CGAGCG      | 261       | 125       | 7.37     |
| ATACTA      | 386       | 213       | 7.37     |
| GATACC      | 549       | 336       | 7.37     |
| TACAGC      | 1168      | 842       | 7.37     |
| GTGAAC      | 975       | 680       | 7.36     |
| CCAGTG      | 2022      | 1583      | 7.36     |
| ACCCTT      | 691       | 448       | 7.36     |
| TCTACT      | 877       | 599       | 7.36     |
| CCTTCG      | 623       | 394       | 7.36     |
| GCTAAA      | 607       | 382       | 7.34     |
| AATGCC      | 1175      | 849       | 7.34     |
| ACCCAC      | 931       | 646       | 7.29     |
| TGAAGG      | 2177      | 1725      | 7.28     |
| CGAGCT      | 629       | 401       | 7.28     |
| AACATG      | 1297      | 956       | 7.26     |
| AAGCAC      | 1111      | 798       | 7.26     |
| ACAAAT      | 1235      | 904       | 7.24     |
| ATGCAG      | 1779      | 1376      | 7.23     |
| AACGGG      | 381       | 212       | 7.23     |
| GATATG      | 717       | 473       | 7.22     |
| GTGGCC      | 1902      | 1485      | 7.22     |
| GCCCCC      | 1324      | 983       | 7.18     |

| <b>Word</b> | <b>Ns</b> | <b>Na</b> | <b>z</b> |
|-------------|-----------|-----------|----------|
| ACACCT      | 1119      | 808       | 7.17     |
| TACGGA      | 276       | 138       | 7.17     |
| ACGCTA      | 160       | 63        | 7.17     |
| ACTAGA      | 449       | 264       | 7.16     |
| TACCAC      | 771       | 519       | 7.15     |
| GCGAGC      | 463       | 275       | 7.15     |
| AGATAT      | 944       | 662       | 7.14     |
| TTACTG      | 934       | 654       | 7.13     |
| CGCAAC      | 265       | 131       | 7.13     |
| CCCTTA      | 392       | 222       | 7.13     |
| ACGTGA      | 461       | 274       | 7.12     |
| ACCACC      | 1537      | 1170      | 7.12     |
| CTTACG      | 187       | 80        | 7.11     |
| ATCACC      | 1281      | 949       | 7.11     |
| GATGTG      | 1488      | 1128      | 7.10     |
| GCAAAA      | 1332      | 993       | 7.10     |
| AGGACA      | 1709      | 1322      | 7.08     |
| GGGAAC      | 960       | 678       | 7.07     |
| TCAACT      | 1120      | 813       | 7.07     |
| GATCCT      | 1231      | 908       | 7.06     |
| AACCTT      | 826       | 567       | 7.06     |
| TCAAGT      | 1193      | 876       | 7.05     |
| AACAGC      | 1642      | 1266      | 7.03     |
| AGATCC      | 1308      | 976       | 7.02     |
| TACTTA      | 385       | 219       | 7.01     |
| TGCAAC      | 955       | 676       | 7.01     |
| CAGTGC      | 1671      | 1293      | 7.00     |
| CAAACC      | 927       | 653       | 6.99     |
| CTATTG      | 593       | 380       | 6.99     |
| ACGAGC      | 452       | 270       | 6.99     |
| AAATGC      | 1260      | 936       | 6.99     |
| AAACGA      | 404       | 234       | 6.97     |
| ACAATG      | 1329      | 997       | 6.95     |
| ACATGA      | 1221      | 904       | 6.95     |
| GACTCA      | 860       | 599       | 6.94     |
| GAGCAG      | 2388      | 1935      | 6.93     |
| GGCCGA      | 732       | 494       | 6.92     |
| CCATCG      | 723       | 487       | 6.91     |
| AGAGTG      | 1136      | 833       | 6.91     |
| AGATAC      | 768       | 524       | 6.91     |
| AGAGCA      | 1710      | 1332      | 6.90     |
| GAACGG      | 424       | 251       | 6.88     |
| ACGTGC      | 564       | 360       | 6.87     |
| ATGCCT      | 1085      | 791       | 6.87     |
| GCTCTA      | 611       | 398       | 6.85     |
| AACCGC      | 339       | 188       | 6.85     |
| ACAAAG      | 1579      | 1220      | 6.84     |
| ACGGAG      | 681       | 455       | 6.84     |

| <b>Word</b> | <b>Ns</b> | <b>Na</b> | <b>z</b> |
|-------------|-----------|-----------|----------|
| TGTACG      | 340       | 189       | 6.84     |
| AGCCAA      | 1521      | 1170      | 6.82     |
| ACATGC      | 953       | 681       | 6.82     |
| AACAGT      | 1105      | 810       | 6.82     |
| GGACGG      | 576       | 371       | 6.82     |
| GTACTA      | 313       | 170       | 6.80     |
| CTAGAC      | 306       | 165       | 6.79     |
| ATTAAA      | 1014      | 734       | 6.78     |
| AATGAC      | 1121      | 826       | 6.76     |
| TACAAT      | 721       | 490       | 6.76     |
| CGCCCT      | 609       | 399       | 6.76     |
| TCCCTG      | 1803      | 1422      | 6.75     |
| AGCGGC      | 827       | 578       | 6.74     |
| CCTAAC      | 284       | 150       | 6.74     |
| GCCGAC      | 476       | 294       | 6.74     |
| AACGAA      | 362       | 207       | 6.74     |
| ACCAGT      | 1191      | 887       | 6.74     |
| TCCTAA      | 592       | 386       | 6.73     |
| TCACCG      | 567       | 366       | 6.73     |
| CATCGC      | 567       | 366       | 6.73     |
| AAAGCC      | 1365      | 1038      | 6.73     |
| TGCGGC      | 719       | 490       | 6.70     |
| TTACGT      | 191       | 87        | 6.69     |
| TGTTAC      | 629       | 417       | 6.69     |
| TTACTA      | 519       | 329       | 6.69     |
| ATACCC      | 456       | 280       | 6.67     |
| ACCCGC      | 421       | 253       | 6.67     |
| GAAACG      | 430       | 260       | 6.67     |
| CCTAAG      | 392       | 231       | 6.66     |
| TGCTAA      | 714       | 487       | 6.66     |
| TCAGAT      | 1350      | 1028      | 6.66     |
| TTACGA      | 238       | 119       | 6.66     |
| ACTGCG      | 471       | 292       | 6.66     |
| GACAGC      | 1694      | 1331      | 6.65     |
| TGGATT      | 1451      | 1117      | 6.64     |
| GGGAGC      | 1428      | 1097      | 6.64     |
| CCAGAT      | 1609      | 1257      | 6.62     |
| ACCTTT      | 923       | 663       | 6.61     |
| ACCGTG      | 660       | 445       | 6.59     |
| ACCTTC      | 1456      | 1125      | 6.57     |
| CGACCG      | 167       | 73        | 6.56     |
| GATGCT      | 1646      | 1294      | 6.54     |
| GTGGTG      | 1845      | 1471      | 6.53     |
| ATTCAG      | 1429      | 1103      | 6.53     |
| CTATCG      | 179       | 81        | 6.53     |
| ACCGCT      | 421       | 256       | 6.53     |
| AGGAAG      | 2601      | 2153      | 6.53     |
| ATGACT      | 1109      | 825       | 6.53     |

| <b>Word</b> | <b>Ns</b> | <b>Na</b> | <b>z</b> |
|-------------|-----------|-----------|----------|
| TGGAGT      | 1642      | 1292      | 6.51     |
| CTAGTG      | 432       | 265       | 6.50     |
| CCGCAA      | 420       | 256       | 6.49     |
| TGAAAT      | 1633      | 1285      | 6.49     |
| ATTTAT      | 1001      | 734       | 6.48     |
| GTGTGG      | 1383      | 1065      | 6.48     |
| GCTATT      | 640       | 432       | 6.47     |
| AGCTAG      | 405       | 245       | 6.46     |
| AGCAAA      | 1664      | 1314      | 6.46     |
| TACGAA      | 275       | 148       | 6.46     |
| ACATGG      | 1409      | 1089      | 6.45     |
| ATTAGA      | 600       | 400       | 6.45     |
| CCTGGT      | 1823      | 1456      | 6.45     |
| CGTGAA      | 544       | 355       | 6.44     |
| CGCGAG      | 212       | 104       | 6.44     |
| CCCTAG      | 306       | 171       | 6.43     |
| TATTGG      | 760       | 533       | 6.41     |
| GACACC      | 1107      | 828       | 6.41     |
| CCTTAT      | 624       | 421       | 6.40     |
| TGTGCG      | 472       | 299       | 6.38     |
| TTCGTG      | 531       | 346       | 6.38     |
| CAAAAC      | 1107      | 829       | 6.38     |
| TCGACA      | 395       | 239       | 6.38     |
| ATGATG      | 2261      | 1854      | 6.37     |
| CTATCC      | 478       | 304       | 6.37     |
| GGATTA      | 569       | 377       | 6.37     |
| GGAGCC      | 1714      | 1363      | 6.37     |
| CTAAAC      | 406       | 248       | 6.36     |
| AGGAAC      | 1466      | 1144      | 6.35     |
| AAGGGA      | 1027      | 762       | 6.33     |
| CAGTTA      | 735       | 515       | 6.32     |
| CTGAAC      | 1313      | 1011      | 6.32     |
| TGAATG      | 1416      | 1102      | 6.30     |
| AATACA      | 978       | 721       | 6.30     |
| CAGAAT      | 1638      | 1299      | 6.30     |
| CTGTGC      | 1800      | 1444      | 6.29     |
| AGGCTA      | 488       | 314       | 6.29     |
| AACCGA      | 312       | 178       | 6.28     |
| GACAAT      | 965       | 711       | 6.27     |
| TTACAT      | 762       | 539       | 6.27     |
| CGAAAG      | 393       | 240       | 6.26     |
| CTAAAA      | 772       | 548       | 6.25     |
| TCGACT      | 347       | 205       | 6.24     |
| GAACCG      | 400       | 246       | 6.23     |
| GCAGTG      | 1812      | 1458      | 6.23     |
| CAGATC      | 1355      | 1052      | 6.22     |
| AGACGG      | 568       | 380       | 6.22     |
| ACCATG      | 1366      | 1062      | 6.22     |

| <b>Word</b> | <b>Ns</b> | <b>Na</b> | <b>z</b> |
|-------------|-----------|-----------|----------|
| ACTTTG      | 1451      | 1137      | 6.22     |
| TTTGAA      | 1878      | 1518      | 6.21     |
| CCGAGG      | 933       | 686       | 6.21     |
| ACGAAA      | 350       | 208       | 6.20     |
| GTGCCT      | 1156      | 879       | 6.19     |
| AACCGG      | 360       | 216       | 6.18     |
| TCATCG      | 709       | 498       | 6.16     |
| TACGTC      | 241       | 128       | 6.16     |
| TTAAAA      | 1169      | 892       | 6.15     |
| CATCTA      | 905       | 664       | 6.15     |
| GCCTAA      | 274       | 152       | 6.15     |
| TCAGAC      | 1041      | 781       | 6.15     |
| TATATG      | 592       | 402       | 6.13     |
| CCGGAA      | 697       | 489       | 6.13     |
| GACAGT      | 1128      | 858       | 6.11     |
| ACTCAC      | 624       | 429       | 6.11     |
| AATGGG      | 981       | 731       | 6.10     |
| CAAAAG      | 1510      | 1195      | 6.10     |
| GTCAGA      | 1105      | 839       | 6.09     |
| ATATGG      | 827       | 600       | 6.08     |
| ACCCGA      | 310       | 180       | 6.08     |
| GATGAC      | 1565      | 1246      | 6.05     |
| CTGCCT      | 1997      | 1635      | 6.04     |
| GCAGAC      | 1186      | 912       | 6.03     |
| GAACAT      | 1285      | 999       | 6.03     |
| TAGAAA      | 1039      | 784       | 6.03     |
| AATCTA      | 515       | 342       | 6.03     |
| AACAAT      | 1010      | 759       | 6.03     |
| GTATGG      | 586       | 400       | 6.03     |
| TGCGAC      | 296       | 171       | 5.99     |
| GGAGGC      | 1912      | 1561      | 5.98     |
| GGAACG      | 429       | 274       | 5.98     |
| TTGTGG      | 1416      | 1117      | 5.98     |
| TATGCT      | 696       | 493       | 5.97     |
| TGTGGC      | 1712      | 1382      | 5.96     |
| TCGACC      | 302       | 176       | 5.96     |
| CCTCTA      | 737       | 528       | 5.95     |
| CGTGAC      | 376       | 233       | 5.95     |
| AAAAGT      | 1289      | 1006      | 5.95     |
| GATTGC      | 598       | 412       | 5.95     |
| AAAGCT      | 1466      | 1163      | 5.95     |
| CCTCAC      | 1202      | 930       | 5.94     |
| GCTGCG      | 983       | 739       | 5.94     |
| TTGGAC      | 984       | 740       | 5.93     |
| CAGCAA      | 2278      | 1897      | 5.92     |
| CCCCAC      | 1312      | 1028      | 5.91     |
| ACGGCA      | 587       | 404       | 5.91     |
| ACTTCG      | 512       | 343       | 5.89     |

| <b>Word</b> | <b>Ns</b> | <b>Na</b> | <b>z</b> |
|-------------|-----------|-----------|----------|
| TAAGAA      | 1012      | 766       | 5.89     |
| GACCCG      | 435       | 281       | 5.88     |
| AAGACG      | 591       | 408       | 5.88     |
| ATTACG      | 199       | 102       | 5.88     |
| TGATTG      | 969       | 729       | 5.88     |
| TGTGAG      | 1169      | 904       | 5.87     |
| CTAATG      | 577       | 397       | 5.86     |
| GAGTGT      | 858       | 634       | 5.86     |
| TTTACA      | 1029      | 782       | 5.86     |
| TTTGAC      | 1108      | 852       | 5.83     |
| CGAAAT      | 333       | 202       | 5.83     |
| CACAAC      | 902       | 673       | 5.83     |
| CAGCCT      | 2266      | 1892      | 5.82     |
| ACCATC      | 1457      | 1161      | 5.82     |
| CCCGCC      | 726       | 523       | 5.82     |
| GTACCC      | 450       | 295       | 5.80     |
| GTGCGA      | 289       | 169       | 5.80     |
| GGACTT      | 1152      | 893       | 5.77     |
| CGACGG      | 271       | 156       | 5.76     |
| CCCGAC      | 414       | 267       | 5.76     |
| CTGCGC      | 738       | 535       | 5.76     |
| GGAAT       | 848       | 629       | 5.76     |
| ACTATT      | 583       | 405       | 5.75     |
| AACCCG      | 284       | 166       | 5.75     |
| TAACTA      | 268       | 154       | 5.75     |
| TCGTGG      | 741       | 538       | 5.74     |
| TACAGT      | 845       | 627       | 5.74     |
| CGTCTA      | 223       | 121       | 5.74     |
| TGTTCG      | 383       | 243       | 5.73     |
| GAGACG      | 553       | 381       | 5.72     |
| ATTGAC      | 802       | 591       | 5.72     |
| CGCATC      | 488       | 328       | 5.70     |
| ACGGGC      | 523       | 357       | 5.69     |
| GAACGC      | 327       | 200       | 5.69     |
| GCAGAG      | 2005      | 1662      | 5.69     |
| ACTATA      | 428       | 280       | 5.68     |
| TGGATA      | 1052      | 809       | 5.68     |
| CGACAT      | 389       | 249       | 5.67     |
| CTTTGA      | 1842      | 1515      | 5.67     |
| TGCGGG      | 691       | 498       | 5.67     |
| ATATTA      | 667       | 478       | 5.66     |
| AACATC      | 1466      | 1177      | 5.65     |
| TCGGGA      | 523       | 358       | 5.65     |
| ATTTGA      | 1231      | 968       | 5.65     |
| GCCCGA      | 524       | 359       | 5.65     |
| GATTGG      | 733       | 535       | 5.62     |
| TGGCCC      | 1703      | 1392      | 5.62     |
| CATTAC      | 618       | 438       | 5.62     |

| <b>Word</b> | <b>Ns</b> | <b>Na</b> | <b>z</b> |
|-------------|-----------|-----------|----------|
| GCATCG      | 542       | 375       | 5.60     |
| GACATT      | 1162      | 909       | 5.60     |
| GCTGAA      | 2031      | 1691      | 5.59     |
| GAATGT      | 1155      | 903       | 5.59     |
| GGATAT      | 846       | 633       | 5.59     |
| TACCAT      | 751       | 552       | 5.57     |
| CGAGGC      | 725       | 530       | 5.57     |
| CGTTAC      | 156       | 76        | 5.57     |
| AGCTTA      | 508       | 348       | 5.56     |
| GAACCA      | 1195      | 940       | 5.56     |
| GAGACT      | 966       | 739       | 5.54     |
| AATCAG      | 1126      | 881       | 5.51     |
| GTGCTG      | 2161      | 1816      | 5.49     |
| GCCCCA      | 1494      | 1210      | 5.49     |
| GACTGC      | 1116      | 873       | 5.49     |
| GTGGGA      | 1195      | 943       | 5.49     |
| TTATGT      | 702       | 513       | 5.48     |
| GGGCTA      | 473       | 322       | 5.45     |
| TCACCT      | 1330      | 1065      | 5.45     |
| AGTTAA      | 568       | 401       | 5.44     |
| ACATTG      | 1200      | 950       | 5.43     |
| CTCTAT      | 694       | 508       | 5.43     |
| ACCCAT      | 724       | 534       | 5.41     |
| TCAGTG      | 1625      | 1332      | 5.41     |
| CTGATG      | 2028      | 1699      | 5.41     |
| GGGGAA      | 1114      | 875       | 5.40     |
| AATTGG      | 871       | 662       | 5.38     |
| ACTTAA      | 512       | 356       | 5.38     |
| AGTGGC      | 1347      | 1084      | 5.36     |
| GTTTGA      | 1101      | 865       | 5.36     |
| GGACGC      | 475       | 326       | 5.35     |
| TGGGGA      | 1677      | 1383      | 5.34     |
| CTCAGT      | 1178      | 935       | 5.32     |
| ACGGAC      | 362       | 235       | 5.31     |
| TACACA      | 809       | 611       | 5.30     |
| CACAAG      | 1158      | 919       | 5.28     |
| TGCTGG      | 3051      | 2654      | 5.27     |
| ATATTG      | 917       | 707       | 5.25     |
| AACTCA      | 1012      | 791       | 5.24     |
| AGCAGT      | 1668      | 1380      | 5.24     |
| CCGCCC      | 624       | 454       | 5.24     |
| ATCTAT      | 631       | 460       | 5.24     |
| GTTACG      | 158       | 81        | 5.23     |
| CGACGT      | 220       | 126       | 5.23     |
| TCGCTA      | 162       | 84        | 5.22     |
| AGGACT      | 1229      | 985       | 5.21     |
| GGGGAC      | 1021      | 800       | 5.21     |
| ACATCC      | 1343      | 1088      | 5.20     |

| <b>Word</b> | <b>Ns</b> | <b>Na</b> | <b>z</b> |
|-------------|-----------|-----------|----------|
| AAGTAT      | 841       | 643       | 5.18     |
| ACACTA      | 430       | 293       | 5.18     |
| ACATCA      | 1760      | 1467      | 5.18     |
| CGCCAT      | 564       | 405       | 5.17     |
| CTATTA      | 458       | 317       | 5.14     |
| TTATCG      | 194       | 108       | 5.14     |
| ACACAA      | 920       | 714       | 5.13     |
| GATGAG      | 1812      | 1517      | 5.13     |
| TAACCC      | 331       | 214       | 5.12     |
| CACCGA      | 569       | 411       | 5.11     |
| GATCGG      | 280       | 174       | 5.10     |
| AGGACG      | 688       | 513       | 5.10     |
| GCACCT      | 1222      | 984       | 5.09     |
| GGCAAG      | 1055      | 835       | 5.09     |
| ACTTAT      | 503       | 356       | 5.08     |
| CGACTG      | 461       | 321       | 5.08     |
| TTACGG      | 201       | 114       | 5.08     |
| GTTTAC      | 530       | 379       | 5.07     |
| TGAGCG      | 518       | 369       | 5.07     |
| ACGTGT      | 434       | 299       | 5.07     |
| AAAACG      | 435       | 300       | 5.06     |
| GCAAGT      | 894       | 694       | 5.06     |
| CATCGT      | 685       | 512       | 5.05     |
| TCGTGA      | 376       | 252       | 5.04     |
| ATCCCT      | 868       | 672       | 5.03     |
| CAGAGG      | 2006      | 1701      | 5.03     |
| GCTTCG      | 545       | 393       | 5.02     |
| TACGCG      | 92        | 39        | 5.01     |
| TTGGAG      | 1844      | 1553      | 5.01     |
